# Supplementary material for: Environmental dynamics of Campylobacter jejuni genotypes circulating in Luxembourg: what is the role of wild birds?
Source: PubMed Central journal article supplement (PMC10327502; doi:10.1099/mgen.0.001031), 2023-06-05
Supplement: mgen-9-1031-s001.pdf [file mgen-9-1031-s001.pdf]

**Supplementary Table 1 – Metadata of bird and water *C. jejuni* isolates:** PubMLST and ENA idea, strain ID, Sampling date and sample ID, Sampling type (bird or surface water), Birds species or water origin, Sequence Type, Complex Type, allele of *gyrA* and *porA* and genotype.

| PubMLST ID | ENA Biosample  | Strain ID       | Sampling date | Sample ID | Sampling type | Bird species/water origin | ST    | Complex Type | fn_gyrA | porA | Genotype            |
|------------|----------------|-----------------|---------------|-----------|---------------|---------------------------|-------|--------------|---------|------|---------------------|
| 112526     | SAMEA112151025 | B015-230519-01  | 23/05/2019    | B015      | Bird          | Swan                      | 45    | 2052         | 7       | 467  | 2052-45-7-467       |
| 112527     | SAMEA112151026 | B021-070519-01  | 07/05/2019    | B021      | Bird          | Carrion crow              | 48    | 153          | 3       | 7    | 153-48-3-7          |
| 112528     | SAMEA112151027 | B023-070519-01  | 07/05/2019    | B023      | Bird          | Carrion crow              | 448   | 2154         | 102     | 2353 | 2154-448-102-2353   |
| 112306     | SAMEA112151028 | B024-230519-01  | 23/05/2019    | B024      | Bird          | Common blackbird          | 1080  | 2300         | 74      | 130  | 2300-1080-74-130    |
| 112529     | SAMEA112151029 | B025-070519-02  | 07/05/2019    | B025      | Bird          | Carrion crow              | 677   | 942          | 19      | 276  | 942-677-19-276      |
| 112530     | SAMEA112151030 | B026-230519-01  | 23/05/2019    | B026      | Bird          | Eurasian magpie           | 448   | 2154         | 102     | 2353 | 2154-448-102-2353   |
| 112531     | SAMEA112151031 | B027-070519-01  | 07/05/2019    | B027      | Bird          | Eurasian magpie           | 45    | 2155         | 7       | 49   | 2155-45-7-49        |
| 112532     | SAMEA112151032 | B028-230519-01  | 23/05/2019    | B028      | Bird          | Carrion crow              | 2491  | 2156         | 11      | 1634 | 2156-2491-11-1634   |
| 112533     | SAMEA112151033 | B029-110619-02  | 11/06/2019    | B029      | Bird          | Eurasian magpie           | 448   | 2624         | 31      | 860  | 2624-448-31-860     |
| 112534     | SAMEA112151034 | B033-110619-01  | 11/06/2019    | B033      | Bird          | Starling                  | 448   | 2624         | 31      | 860  | 2624-448-31-860     |
| 112535     | SAMEA112151035 | B036-110619-01  | 11/06/2019    | B036      | Bird          | Western jackdaw           | 1540  | 2157         | 40      | 860  | 2157-1540-40-860    |
| 112537     | SAMEA112151036 | B036-110619-03  | 11/06/2019    | B036      | Bird          | Western jackdaw           | 10813 | 2157         | 11      | 2351 | 2157-10813-11-2351  |
| 112538     | SAMEA112151037 | B037-110619-01  | 11/06/2019    | B037      | Bird          | Western jackdaw           | 45    | 2158         | 7       | 49   | 2158-45-7-49        |
| 112539     | SAMEA112151038 | B038-110619-01  | 11/06/2019    | B038      | Bird          | Western jackdaw           | 10818 | 2159         | 104     | 391  | 2159-10818-104-391  |
| 112540     | SAMEA112151039 | B038-110619-02  | 11/06/2019    | B038      | Bird          | Western jackdaw           | 10811 | 2160         | 36      | 1279 | 2160-10811-36-1279  |
| 112541     | SAMEA112151040 | B038-110619-03  | 11/06/2019    | B038      | Bird          | Western jackdaw           | 10817 | 2161         | 103     | 2354 | 2161-10817-103-2354 |
| 112542     | SAMEA112151041 | B039-110619-03  | 11/06/2019    | B039      | Bird          | Western jackdaw           | 10820 | 2162         | 11      | 1224 | 2162-10820-11-1224  |
| 112543     | SAMEA112151042 | B040F-110619-01 | 11/06/2019    | B040      | Bird          | Eurasian magpie           | 11002 | 2625         | 99      | 2347 | 2625-11002-99-2347  |
| 112544     | SAMEA112151043 | B041-110619-02  | 11/06/2019    | B041      | Bird          | Carrion crow              | 4279  | 2163         | 31      | 1638 | 2163-4279-31-1638   |
| 112545     | SAMEA112151044 | B042-110619-01  | 11/06/2019    | B042      | Bird          | Carrion crow              | 11003 | 2626         | 36      | 127  | 2626-11003-36-127   |
| 112546     | SAMEA112151045 | B042F-110619-01 | 11/06/2019    | B042      | Bird          | Carrion crow              | 1282  | 2164         | 11      | 2350 | 2164-1282-11-2350   |
| 112547     | SAMEA112151046 | B045-180619-01  | 18/06/2019    | B045      | Bird          | Western jackdaw           | 464   | 596          | 3       | 2348 | 596-464-3-2348      |
| 112548     | SAMEA112151047 | B046-180619-01  | 18/06/2019    | B046      | Bird          | Common blackbird          | 677   | 38           | 19      | 276  | 38-677-19-276       |
| 112549     | SAMEA112151048 | B047-180619-01  | 18/06/2019    | B047      | Bird          | Falcon                    | 19    | 2165         | 8       | 327  | 2165-19-8-327       |
| 112550     | SAMEA112151049 | B050-180619-01  | 18/06/2019    | B050      | Bird          | Western jackdaw           | 10813 | 2166         | 11      | 2351 | 2166-10813-11-2351  |
| 112551     | SAMEA112151050 | B050-180619-02  | 18/06/2019    | B050      | Bird          | Western jackdaw           | 1080  | 2301         | 74      | 130  | 2301-1080-74-130    |

|        |                |                |            |      |      |                  |       |      |     |      |                     |
|--------|----------------|----------------|------------|------|------|------------------|-------|------|-----|------|---------------------|
| 112552 | SAMEA112151051 | B051-180619-02 | 18/06/2019 | B051 | Bird | Carrion crow     | 10815 | 2167 | 11  | 479  | 2167-10815-11-479   |
| 112553 | SAMEA112151052 | B052-180619-01 | 18/06/2019 | B052 | Bird | Western jackdaw  | 7815  | 2168 | 11  | 2352 | 2168-7815-11-2352   |
| 112317 | SAMEA112151053 | B053-180619-01 | 18/06/2019 | B053 | Bird | Western jackdaw  | 10813 | 2627 | 11  | 2351 | 2627-10813-11-2351  |
| 112554 | SAMEA112151054 | B054-180619-01 | 18/06/2019 | B054 | Bird | Carrion crow     | 3536  | 2169 | 104 | 391  | 2169-3536-104-391   |
| 112555 | SAMEA112151055 | B054-180619-02 | 18/06/2019 | B054 | Bird | Carrion crow     | 801   | 2598 | 36  | 127  | 2598-801-36-127     |
| 111041 | SAMEA112151056 | B063-020719-01 | 02/07/2019 | B063 | Bird | Common swift     | 11384 | 2170 | 31  | 236  | 2170-11384-31-236   |
| 112556 | SAMEA112151057 | B063-020719-02 | 02/07/2019 | B063 | Bird | Common swift     | 22    | 277  | 8   | 70   | 277-22-8-70         |
| 112557 | SAMEA112151058 | B067-020719-01 | 02/07/2019 | B067 | Bird | Eurasian magpie  | 383   | 251  | 1   | 73   | 251-383-1-73        |
| 112558 | SAMEA112151059 | B068-020719-02 | 02/07/2019 | B068 | Bird | Eurasian magpie  | 383   | 251  | 1   | 73   | 251-383-1-73        |
| 112559 | SAMEA112151060 | B070-020719-01 | 02/07/2019 | B070 | Bird | Common blackbird | 45    | 2171 | 7   | 44   | 2171-45-7-44        |
| 112560 | SAMEA112151061 | B071-020719-01 | 02/07/2019 | B071 | Bird | Carrion crow     | 45    | 2171 | 7   | 44   | 2171-45-7-44        |
| 112561 | SAMEA112151062 | B072-020719-02 | 02/07/2019 | B072 | Bird | Carrion crow     | 45    | 2171 | 7   | 44   | 2171-45-7-44        |
| 112562 | SAMEA112151063 | B073-020719-02 | 02/07/2019 | B073 | Bird | Carrion crow     | 3536  | 2169 | 104 | 391  | 2169-3536-104-391   |
| 112563 | SAMEA112151064 | B083-160719-02 | 16/07/2019 | B083 | Bird | Falcon           | 383   | 251  | 1   | 73   | 251-383-1-73        |
| 112564 | SAMEA112151065 | B086-160719-01 | 16/07/2019 | B086 | Bird | Pigeon           | 383   | 251  | 1   | 73   | 251-383-1-73        |
| 112565 | SAMEA112151066 | B096-300719-02 | 30/07/2019 | B096 | Bird | Carrion crow     | 951   | 2277 | 31  | 2358 | 2277-951-31-2358    |
| 112566 | SAMEA112151067 | B097-300719-02 | 30/07/2019 | B097 | Bird | Western jackdaw  | 801   | 2598 | 36  | 127  | 2598-801-36-127     |
| 112567 | SAMEA112151068 | B100-300719-01 | 30/07/2019 | B100 | Bird | Common swift     | 383   | 251  | 1   | 73   | 251-383-1-73        |
| 112568 | SAMEA112151069 | B100-300719-02 | 30/07/2019 | B100 | Bird | Common swift     | 475   | 827  | 5   | 67   | 827-475-5-67        |
| 112569 | SAMEA112151070 | B102-300719-02 | 30/07/2019 | B102 | Bird | Common blackbird | 583   | 459  | 1   | 73   | 459-583-1-73        |
| 112570 | SAMEA112151071 | B103-300719-02 | 30/07/2019 | B103 | Bird | Common blackbird | 177   | 2172 | 31  | 236  | 2172-177-31-236     |
| 112571 | SAMEA112151072 | B104-300719-01 | 30/07/2019 | B104 | Bird | Common blackbird | 177   | 2172 | 31  | 236  | 2172-177-31-236     |
| 112572 | SAMEA112151073 | B108-130819-01 | 13/08/2019 | B108 | Bird | Falcon           | 19    | 2165 | 8   | 327  | 2165-19-8-327       |
| 112573 | SAMEA112151074 | B112-130819-01 | 13/08/2019 | B112 | Bird | Carrion crow     | 7882  | 2599 | 36  | 2357 | 2599-7882-36-2357   |
| 112574 | SAMEA112151075 | B113-130819-01 | 13/08/2019 | B113 | Bird | Carrion crow     | 801   | 2598 | 36  | 127  | 2598-801-36-127     |
| 112575 | SAMEA112151076 | B113-130819-02 | 13/08/2019 | B113 | Bird | Carrion crow     | 7836  | 2303 | 99  | 2347 | 2303-7836-99-2347   |
| 112576 | SAMEA112151077 | B114-130819-01 | 13/08/2019 | B114 | Bird | Common blackbird | 10810 | 2173 | 101 | 2355 | 2173-10810-101-2355 |
| 112577 | SAMEA112151078 | B114-130819-03 | 13/08/2019 | B114 | Bird | Common blackbird | 1277  | 2600 | 105 | 2359 | 2600-1277-105-2359  |
| 112578 | SAMEA112151079 | B119-270819-01 | 27/08/2019 | B119 | Bird | Eurasian magpie  | 11004 | 2601 | 106 | 1772 | 2601-11004-106-1772 |
| 112579 | SAMEA112151080 | B121-270819-02 | 27/08/2019 | B121 | Bird | Carrion crow     | 6591  | 2602 | 11  | 1634 | 2602-6591-11-1634   |

|        |                |                |            |      |      |                   |       |      |     |      |                     |
|--------|----------------|----------------|------------|------|------|-------------------|-------|------|-----|------|---------------------|
| 112580 | SAMEA112151081 | B122-270819-02 | 27/08/2019 | B122 | Bird | Common buzzard    | 19    | 2165 | 8   | 327  | 2165-19-8-327       |
| 112581 | SAMEA112151082 | B123-270819-01 | 27/08/2019 | B123 | Bird | Falcon            | 19    | 2165 | 8   | 327  | 2165-19-8-327       |
| 112583 | SAMEA112151083 | B158-221019-01 | 22/10/2019 | B158 | Bird | Carrion crow      | 5846  | 2304 | 40  | 858  | 2304-5846-40-858    |
| 112584 | SAMEA112151084 | B167-230720-01 | 23/07/2020 | B167 | Bird | Common swift      | 1044  | 84   | 27  | 25   | 84-1044-27-25       |
| 112585 | SAMEA112151085 | B183-300720-01 | 30/07/2020 | B183 | Bird | Common blackbird  | 11    | 414  | 7   | 217  | 414-11-7-217        |
| 112586 | SAMEA112151086 | B185-300720-01 | 30/07/2020 | B185 | Bird | Common blackbird  | 11    | 414  | 7   | 217  | 414-11-7-217        |
| 112587 | SAMEA112151087 | B189-130820-01 | 13/08/2020 | B189 | Bird | Common blackbird  | 8614  | 2612 | 36  | 6    | 2612-8614-36-6      |
| 112588 | SAMEA112151088 | B190-130820-01 | 13/08/2020 | B190 | Bird | Common blackbird  | 11    | 414  | 7   | 217  | 414-11-7-217        |
| 112590 | SAMEA112151089 | B193-200820-02 | 20/08/2020 | B193 | Bird | Duck              | 5207  | 2614 | 51  | 2356 | 2614-5207-51-2356   |
| 112591 | SAMEA112151090 | B194-200820-01 | 20/08/2020 | B194 | Bird | Egyptian goose    | 8614  | 2612 | 36  | 6    | 2612-8614-36-6      |
| 112592 | SAMEA112151091 | B198-200820-01 | 20/08/2020 | B198 | Bird | Egyptian goose    | 11    | 414  | 7   | 217  | 414-11-7-217        |
| 111042 | SAMEA112151092 | B203-270820-01 | 27/08/2020 | B203 | Bird | Carrion crow      | 11385 | 3163 | 80  | 203  | 3163-11385-80-203   |
| 111038 | SAMEA112151093 | B203-270820-02 | 27/08/2020 | B203 | Bird | Carrion crow      | 11381 | 3164 | 109 | 2368 | 3164-11381-109-2368 |
| 112593 | SAMEA112151094 | B203-270820-04 | 27/08/2020 | B203 | Bird | Carrion crow      | 677   | 36   | 19  | 276  | 36-677-19-276       |
| 112594 | SAMEA112151095 | B208-100920-01 | 10/09/2020 | B208 | Bird | Western jackdaw   | 677   | 36   | 19  | 276  | 36-677-19-276       |
| 112595 | SAMEA112151096 | B221-240920-01 | 24/09/2020 | B221 | Bird | Egyptian goose    | 1294  | 2460 | 13  | 152  | 2460-1294-13-152    |
| 111033 | SAMEA112151097 | B250-060321-01 | 06/03/2021 | B250 | Bird | Yellowhammer      | 11376 | 3165 | 108 | 2370 | 3165-11376-108-2370 |
| 112596 | SAMEA112151098 | B251-060321-01 | 06/03/2021 | B251 | Bird | Yellowhammer      | 11376 | 3165 | 108 | 2370 | 3165-11376-108-2370 |
| 112597 | SAMEA112151099 | B266-270321-01 | 27/03/2021 | B266 | Bird | Eurasian blackcap | 6313  | 3166 | 107 | 2369 | 3166-6313-107-2369  |
| 112598 | SAMEA112151100 | B284-140421-02 | 14/04/2021 | B284 | Bird | Eurasian blackcap | 11413 | 3257 | 22  | 2371 | 3257-11413-22-2371  |
| 112599 | SAMEA112151101 | B285-140421-02 | 14/04/2021 | B285 | Bird | Eurasian blackcap | 1316  | 3167 | 74  | 463  | 3167-1316-74-463    |
| 112600 | SAMEA112151102 | B288-140421-02 | 14/04/2021 | B288 | Bird | Eurasian blackcap | 6313  | 3168 | 107 | 2369 | 3168-6313-107-2369  |
| 112601 | SAMEA112151103 | B299-140421-01 | 14/04/2021 | B299 | Bird | Eurasian blackcap | 6313  | 3168 | 107 | 2369 | 3168-6313-107-2369  |
| 112602 | SAMEA112151104 | B300-140421-01 | 14/04/2021 | B300 | Bird | Eurasian blackcap | 1080  | 3169 | 74  | 130  | 3169-1080-74-130    |
| 112603 | SAMEA112151105 | B302-140421-01 | 14/04/2021 | B302 | Bird | Eurasian blackcap | 6313  | 3168 | 107 | 2369 | 3168-6313-107-2369  |
| 112604 | SAMEA112151106 | B303-140421-01 | 14/04/2021 | B303 | Bird | Yellowhammer      | 11376 | 3165 | 108 | 2370 | 3165-11376-108-2370 |
| 112605 | SAMEA112151107 | B308-140421-01 | 14/04/2021 | B308 | Bird | Yellowhammer      | 11376 | 3165 | 108 | 2370 | 3165-11376-108-2370 |
| 112606 | SAMEA112151108 | B318-050521-01 | 05/05/2021 | B318 | Bird | Long-eared owl    | 45    | 2042 | 7   | 49   | 2042-45-7-49        |
| 112607 | SAMEA112151109 | B320-050521-02 | 05/05/2021 | B320 | Bird | Eurasian magpie   | 4570  | 3170 | 37  | 1795 | 3170-4570-37-1795   |
| 111040 | SAMEA112151110 | B321-050521-01 | 05/05/2021 | B321 | Bird | Eurasian magpie   | 11383 | 3171 | 11  | 1598 | 3171-11383-11-1598  |

|        |                |                |            |      |               |                          |       |      |     |      |                     |
|--------|----------------|----------------|------------|------|---------------|--------------------------|-------|------|-----|------|---------------------|
| 112608 | SAMEA112151111 | B325-250521-01 | 25/05/2021 | B325 | Bird          | Western jackdaw          | 563   | 3172 | 31  | 909  | 3172-563-31-909     |
| 112609 | SAMEA112151112 | B326-250521-01 | 25/05/2021 | B326 | Bird          | Western jackdaw          | 4570  | 3170 | 37  | 1795 | 3170-4570-37-1795   |
| 111039 | SAMEA112151113 | B327-250521-01 | 25/05/2021 | B327 | Bird          | Carrion crow             | 11382 | 3173 | 31  | 1468 | 3173-11382-31-1468  |
| 112610 | SAMEA112151114 | B328-250521-02 | 25/05/2021 | B328 | Bird          | Carrion crow             | 6386  | 3174 | 36  | 406  | 3174-6386-36-406    |
| 112611 | SAMEA112151115 | B329-250521-01 | 25/05/2021 | B329 | Bird          | Common blackbird         | 677   | 36   | 19  | 276  | 36-677-19-276       |
| 112612 | SAMEA112151116 | B330-250521-01 | 25/05/2021 | B330 | Bird          | Starling                 | 677   | 2070 | 19  | 276  | 2070-677-19-276     |
| 112613 | SAMEA112151117 | B331-250521-01 | 25/05/2021 | B331 | Bird          | Great tit                | 45    | 297  | 7   | 49   | 297-45-7-49         |
| 111034 | SAMEA112151118 | B333-250521-01 | 25/05/2021 | B333 | Bird          | Common blackbird         | 11377 | 3175 | 101 | 970  | 3175-11377-101-970  |
| 111298 | SAMEA112151119 | B335-070621-01 | 07/06/2021 | B335 | Bird          | Western jackdaw          | 11584 | 3258 | 11  | 2372 | 3258-11584-11-2372  |
| 112614 | SAMEA112151120 | B336-070621-01 | 07/06/2021 | B336 | Bird          | Western jackdaw          | 11379 | 3176 | 11  | 2367 | 3176-11379-11-2367  |
| 112615 | SAMEA112151121 | B336-070621-02 | 07/06/2021 | B336 | Bird          | Western jackdaw          | 1481  | 3177 | 31  | 1836 | 3177-1481-31-1836   |
| 112944 | SAMEA112151122 | B337-070621-01 | 07/06/2021 | B337 | Bird          | Eurasian magpie          | 1044  | 84   | 27  | 25   | 84-1044-27-25       |
| 111036 | SAMEA112151123 | B338-070621-02 | 07/06/2021 | B338 | Bird          | Western jackdaw          | 11379 | 3178 | 11  | 2367 | 3178-11379-11-2367  |
| 112616 | SAMEA112151124 | B339-070621-01 | 07/06/2021 | B339 | Bird          | Carrion crow             | 267   | 1407 | 1   | 73   | 1407-267-1-73       |
| 112617 | SAMEA112151125 | B342-070621-01 | 07/06/2021 | B342 | Bird          | Great spotted woodpecker | 19    | 82   | 8   | 7    | 82-19-8-7           |
| 112618 | SAMEA112151126 | B345-080621-01 | 08/06/2021 | B345 | Bird          | Dunnock                  | 383   | 251  | 1   | 73   | 251-383-1-73        |
| 112619 | SAMEA112151127 | B353-210621-01 | 21/06/2021 | B353 | Bird          | Western jackdaw          | 448   | 2506 | 31  | 639  | 2506-448-31-639     |
| 112620 | SAMEA112151128 | B354-210621-01 | 21/06/2021 | B354 | Bird          | Eurasian jay             | 2162  | 3179 | 7   | 634  | 3179-2162-7-634     |
| 112621 | SAMEA112151129 | B355-210621-01 | 21/06/2021 | B355 | Bird          | Common chaffinch         | 267   | 2744 | 1   | 73   | 2744-267-1-73       |
| 111035 | SAMEA112151130 | B357-210621-01 | 21/06/2021 | B357 | Bird          | Western jackdaw          | 11378 | 3180 | 7   | 1621 | 3180-11378-7-1621   |
| 112622 | SAMEA112151131 | B358-210621-01 | 21/06/2021 | B358 | Bird          | Common blackbird         | 11    | 3181 | 7   | 217  | 3181-11-7-217       |
| 112623 | SAMEA112151132 | B361-210621-01 | 21/06/2021 | B361 | Bird          | Common blackbird         | 230   | 2282 | 1   | 217  | 2282-230-1-217      |
| 112624 | SAMEA112151133 | B362-210621-01 | 21/06/2021 | B362 | Bird          | Common blackbird         | 267   | 2744 | 1   | 73   | 2744-267-1-73       |
| 111037 | SAMEA112151134 | B364-210621-01 | 21/06/2021 | B364 | Bird          | Eurasian magpie          | 11380 | 3182 | 11  | 200  | 3182-11380-11-200   |
| 112625 | SAMEA112151135 | W021-240919-01 | 24/09/2019 | W021 | Surface water | Moselle                  | 704   | 2604 | 13  | 886  | 2604-704-13-886     |
| 112636 | SAMEA112151136 | W023-021219-02 | 02/12/2019 | W023 | Surface water | Alzette                  | 538   | 1392 | 7   | 73   | 1392-538-7-73       |
| 112638 | SAMEA112151137 | W025-021219-02 | 02/12/2019 | W025 | Surface water | Alzette                  | 11466 | 2278 | 100 | 2349 | 2278-11466-100-2349 |
| 112643 | SAMEA112151138 | W028-300120-01 | 30/01/2020 | W028 | Surface water | Alzette                  | 9897  | 2279 | 9   | 18   | 2279-9897-9-18      |
| 112648 | SAMEA112151139 | W030-300120-02 | 30/01/2020 | W030 | Surface water | Alzette                  | 9897  | 2279 | 9   | 18   | 2279-9897-9-18      |
| 112653 | SAMEA112151140 | W033-270220-02 | 27/02/2020 | W033 | Surface water | Alzette                  | 4279  | 2280 | 31  | 1638 | 2280-4279-31-1638   |

|        |                |                |            |      |               |         |       |      |    |      |                    |
|--------|----------------|----------------|------------|------|---------------|---------|-------|------|----|------|--------------------|
| 111032 | SAMEA112151141 | W045-270820-05 | 27/08/2020 | W045 | Surface water | Alzette | 11375 | 3183 | 10 | 92   | 3183-11375-10-92   |
| 112673 | SAMEA112151142 | W052-240920-02 | 24/09/2020 | W052 | Surface water | Sûre    | 991   | 2620 | 4  | 6    | 2620-991-4-6       |
| 112945 | SAMEA112168221 | W082-250521-04 | 25/05/2021 | W082 | Surface water | Alzette | 45    | 663  | 7  | 49   | 663-45-7-49        |
| 112745 | SAMEA112151143 | W087-210621-01 | 21/06/2021 | W087 | Surface water | Alzette | 10102 | 3184 | 11 | 2366 | 3184-10102-11-2366 |

**Supplementary Table 2 – Metadata of human, animals and food *C. jejuni* isolates:** PubMLST and ENA idea, strain ID, Sampling year, Sampling type, Sequence Type, Complex Type, allele of *gyrA* and *porA* and genotype.

| PubMLST ID | ENA Biosample  | Strain ID | Sampling year | Sampling type | ST   | Complex Type | fn_gyrA | porA | Genotype         |
|------------|----------------|-----------|---------------|---------------|------|--------------|---------|------|------------------|
|            | SAMEA112765435 | 180430    | 2018          | Chicken       | 50   | 53           | 1       | 6    | 53-50-1-6        |
|            | SAMEA112765436 | 180663    | 2018          | Chicken       | 6175 | 543          | 9       | 1625 | 543-6175-9-1625  |
|            | SAMEA112765437 | 180667    | 2018          | Chicken       | 257  | 72           | 10      | 1    | 72-257-10-1      |
|            | SAMEA112765538 | 190569    | 2019          | Chicken       | 353  | 166          | 9       | 164  | 166-353-9-164    |
|            | SAMEA112765539 | 191062    | 2019          | Poultry       | 400  | 219          | 15      | 98   | 219-400-15-98    |
|            | SAMEA112765580 | 200148    | 2020          | Chicken       | 50   | 53           | 1       | 6    | 53-50-1-6        |
|            | SAMEA112765581 | 200220    | 2020          | Chicken       | 6175 | 543          | 9       | 1625 | 543-6175-9-1625  |
| 114911     | SAMEA112763457 | 200227    | 2020          | Chicken       | 475  | 827          | 5       | 67   | 827-475-5-67     |
| 114912     | SAMEA112763458 | 200776    | 2020          | Turkey        | 19   | 82           | 8       | 7    | 82-19-8-7        |
|            | SAMEA112765584 | 200782    | 2020          | Chicken       | 257  | 72           | 9       | 1    | 72-257-9-1       |
|            | SAMEA112765585 | 200869    | 2020          | Chicken       | 257  | 72           | 10      | 1    | 72-257-10-1      |
| 114913     | SAMEA112763459 | 200875    | 2020          | Turkey        | 475  | 827          | 5       | 67   | 827-475-5-67     |
|            | SAMEA112765586 | 201032    | 2020          | Chicken       | 122  | 377          | 3       | 7    | 377-122-3-7      |
|            | SAMEA112765654 | 210595    | 2021          | Turkey        | 19   | 1355         | 8       | 1    | 1355-19-8-1      |
|            | SAMEA112765438 | 1800236   | 2018          | Bovine        | 19   | 82           | 8       | 7    | 82-19-8-7        |
| 114914     | SAMEA112763460 | 1800242   | 2018          | Bovine        | 19   | 82           | 8       | 7    | 82-19-8-7        |
|            | SAMEA112765439 | 1803931   | 2018          | Bovine        | 353  | 166          | 9       | 164  | 166-353-9-164    |
| 114915     | SAMEA112763461 | 1807713   | 2018          | Bovine        | 19   | 82           | 8       | 7    | 82-19-8-7        |
|            | SAMEA112765440 | 1807761   | 2018          | Bovine        | 19   | 82           | 8       | 2023 | 82-19-8-2023     |
| 114916     | SAMEA112763462 | 1900536   | 2019          | Bovine        | 475  | 827          | 5       | 67   | 827-475-5-67     |
| 114917     | SAMEA112763463 | 1903771   | 2019          | Bovine        | 19   | 82           | 8       | 7    | 82-19-8-7        |
|            | SAMEA112765540 | 1905326   | 2019          | Food          | 353  | 166          | 9       | 164  | 166-353-9-164    |
| 114918     | SAMEA112763464 | 1908964   | 2019          | Bovine        | 19   | 82           | 8       | 7    | 82-19-8-7        |
| 114919     | SAMEA112763465 | 2001486   | 2020          | Bovine        | 19   | 82           | 1       | 7    | 82-19-1-7        |
| 114920     | SAMEA112763466 | 2001937   | 2020          | Bovine        | 19   | 82           | 1       | 7    | 82-19-1-7        |
| 114921     | SAMEA112763467 | 2004663   | 2020          | Bovine        | 19   | 82           | 8       | 7    | 82-19-8-7        |
|            | SAMEA112765649 | 2101656   | 2021          | Bovine        | 7355 | 2151         | 9       | 2360 | 2151-7355-9-2360 |
|            | SAMEA112765650 | 2103383   | 2021          | Bovine        | 19   | 82           | 8       | 7    | 82-19-8-7        |
| 114923     | SAMEA112763469 | 2103683   | 2021          | Bovine        | 19   | 82           | 8       | 7    | 82-19-8-7        |

|        |                |            |      |         |      |      |    |      |                  |
|--------|----------------|------------|------|---------|------|------|----|------|------------------|
| 114924 | SAMEA112763470 | 2104091    | 2021 | Bovine  | 19   | 82   | 8  | 7    | 82-19-8-7        |
|        | SAMEA112765652 | 2104711    | 2021 | Bovine  | 19   | 1355 | 8  | 1    | 1355-19-8-1      |
| 114945 | SAMEA112763492 | 1802145-1  | 2018 | Bovine  | 19   | 82   | 1  | 7    | 82-19-1-7        |
|        | SAMEA112765441 | 1809013-5  | 2018 | Poultry | 6175 | 543  | 9  | 1625 | 543-6175-9-1625  |
|        | SAMEA112765647 | 2009269-1  | 2020 | Poultry | 7355 | 2151 | 9  | 2360 | 2151-7355-9-2360 |
|        | SAMEA112765648 | 2009278-2  | 2020 | Bovine  | 7355 | 2151 | 9  | 2360 | 2151-7355-9-2360 |
|        | SAMEA112765655 | 2106522-3  | 2021 | Bovine  | 257  | 72   | 10 | 1    | 72-257-10-1      |
| 109854 | SAMEA7489960   | Camp036    | 2018 | Bovine  | 19   | 82   | 8  | 7    | 82-19-8-7        |
| 109856 | SAMEA7489961   | Camp037    | 2018 | Bovine  | 19   | 82   | 8  | 7    | 82-19-8-7        |
| 109881 | SAMEA7489975   | Camp052    | 2018 | Human   | 2254 | 51   | 9  | 1    | 51-2254-9-1      |
| 109882 | SAMEA7489976   | Camp053    | 2018 | Human   | 2254 | 51   | 9  | 1    | 51-2254-9-1      |
| 109931 | SAMEA7489998   | Camp086    | 2018 | Chicken | 6175 | 543  | 9  | 1625 | 543-6175-9-1625  |
| 109932 | SAMEA7489999   | Camp087    | 2018 | Human   | 6175 | 543  | 9  | 1625 | 543-6175-9-1625  |
| 110226 | SAMEA7490000   | Camp088    | 2018 | Human   | 6175 | 543  | 9  | 1625 | 543-6175-9-1625  |
| 109937 | SAMEA7490001   | Camp089    | 2018 | Human   | 6175 | 543  | 9  | 1625 | 543-6175-9-1625  |
|        | SAMEA112765583 | Camp121    | 2020 | Chicken | 19   | 1355 | 8  | 1    | 1355-19-8-1      |
|        | SAMEA112765641 | Camp122    | 2020 | Human   | 19   | 1355 | 8  | 1    | 1355-19-8-1      |
|        | SAMEA112765631 | Camp123    | 2020 | Human   | 50   | 1377 | 3  | 6    | 1377-50-3-6      |
|        | SAMEA112765645 | Camp132    | 2020 | Human   | 50   | 441  | 3  | 6    | 441-50-3-6       |
|        | SAMEA112765582 | Camp137    | 2020 | Chicken | 21   | 50   | 1  | 7    | 50-21-1-7        |
| 114922 | SAMEA112763468 | Camp140    | 2020 | Bovine  | 19   | 82   | 8  | 7    | 82-19-8-7        |
|        | SAMEA112765541 | LNS0026606 | 2019 | Human   | 6175 | 543  | 9  | 1625 | 543-6175-9-1625  |
|        | SAMEA112765664 | LNS0034869 | 2021 | Human   | 122  | 377  | 3  | 7    | 377-122-3-7      |
|        | SAMEA112765542 | LNS0036110 | 2019 | Human   | 257  | 72   | 10 | 1    | 72-257-10-1      |
|        | SAMEA112765604 | LNS0037273 | 2020 | Human   | 7355 | 2151 | 9  | 2360 | 2151-7355-9-2360 |
|        | SAMEA112765672 | LNS0062340 | 2021 | Human   | 21   | 50   | 1  | 7    | 50-21-1-7        |
|        | SAMEA112765442 | LNS0075173 | 2018 | Human   | 6175 | 543  | 9  | 1625 | 543-6175-9-1625  |
|        | SAMEA112765443 | LNS0076217 | 2018 | Human   | 6175 | 543  | 9  | 1625 | 543-6175-9-1625  |
|        | SAMEA112765679 | LNS0130509 | 2021 | Human   | 2254 | 51   | 9  | 1    | 51-2254-9-1      |
|        | SAMEA112765444 | LNS0135444 | 2018 | Human   | 50   | 1377 | 3  | 6    | 1377-50-3-6      |
|        | SAMEA112765445 | LNS0166826 | 2018 | Human   | 6175 | 543  | 9  | 1625 | 543-6175-9-1625  |
|        | SAMEA112765446 | LNS0184308 | 2018 | Human   | 50   | 441  | 3  | 6    | 441-50-3-6       |

|        |                |            |      |       |      |      |    |      |                  |
|--------|----------------|------------|------|-------|------|------|----|------|------------------|
|        | SAMEA112765447 | LNS0213030 | 2018 | Human | 353  | 166  | 9  | 164  | 166-353-9-164    |
|        | SAMEA112765448 | LNS0230559 | 2018 | Human | 6175 | 543  | 9  | 1625 | 543-6175-9-1625  |
|        | SAMEA112765449 | LNS0277685 | 2018 | Human | 400  | 219  | 15 | 98   | 219-400-15-98    |
|        | SAMEA112765656 | LNS0298000 | 2021 | Human | 50   | 441  | 3  | 6    | 441-50-3-6       |
|        | SAMEA112765543 | LNS0333101 | 2019 | Human | 6175 | 543  | 9  | 1625 | 543-6175-9-1625  |
|        | SAMEA112765544 | LNS0391085 | 2019 | Human | 50   | 53   | 1  | 6    | 53-50-1-6        |
|        | SAMEA112765450 | LNS0432769 | 2018 | Human | 6175 | 543  | 9  | 1625 | 543-6175-9-1625  |
|        | SAMEA112765451 | LNS0456874 | 2018 | Human | 50   | 441  | 3  | 6    | 441-50-3-6       |
|        | SAMEA112765640 | LNS0458248 | 2020 | Human | 2254 | 51   | 9  | 1    | 51-2254-9-1      |
|        | SAMEA112765452 | LNS0483513 | 2018 | Human | 400  | 219  | 15 | 98   | 219-400-15-98    |
|        | SAMEA112765453 | LNS0620851 | 2018 | Human | 21   | 50   | 1  | 7    | 50-21-1-7        |
|        | SAMEA112765454 | LNS0643347 | 2018 | Human | 2254 | 51   | 9  | 1    | 51-2254-9-1      |
|        | SAMEA112765665 | LNS0666021 | 2021 | Human | 7355 | 2151 | 9  | 2360 | 2151-7355-9-2360 |
|        | SAMEA112765590 | LNS0672454 | 2020 | Human | 122  | 377  | 3  | 7    | 377-122-3-7      |
|        | SAMEA112765624 | LNS0692858 | 2020 | Human | 122  | 377  | 3  | 7    | 377-122-3-7      |
|        | SAMEA112765455 | LNS0721049 | 2018 | Human | 353  | 166  | 9  | 164  | 166-353-9-164    |
|        | SAMEA112765625 | LNS0766413 | 2020 | Human | 7355 | 2151 | 9  | 2360 | 2151-7355-9-2360 |
|        | SAMEA112765545 | LNS0799124 | 2019 | Human | 400  | 219  | 15 | 98   | 219-400-15-98    |
|        | SAMEA112765659 | LNS0841228 | 2021 | Human | 19   | 1355 | 8  | 1    | 1355-19-8-1      |
|        | SAMEA112765456 | LNS0899902 | 2018 | Human | 50   | 53   | 1  | 6    | 53-50-1-6        |
|        | SAMEA112765612 | LNS0926723 | 2020 | Human | 19   | 1355 | 8  | 1    | 1355-19-8-1      |
|        | SAMEA112765546 | LNS0927051 | 2019 | Human | 353  | 166  | 9  | 164  | 166-353-9-164    |
|        | SAMEA112765618 | LNS0948878 | 2020 | Human | 7355 | 2151 | 9  | 2360 | 2151-7355-9-2360 |
| 114928 | SAMEA112763474 | LNS1096056 | 2018 | Human | 19   | 82   | 8  | 7    | 82-19-8-7        |
|        | SAMEA112765457 | LNS1186273 | 2018 | Human | 6175 | 543  | 9  | 1625 | 543-6175-9-1625  |
|        | SAMEA112765547 | LNS1249920 | 2019 | Human | 21   | 50   | 1  | 7    | 50-21-1-7        |
|        | SAMEA112765587 | LNS1271330 | 2020 | Human | 50   | 441  | 3  | 6    | 441-50-3-6       |
|        | SAMEA112765595 | LNS1278551 | 2020 | Human | 6175 | 543  | 9  | 1625 | 543-6175-9-1625  |
|        | SAMEA112765458 | LNS1282200 | 2018 | Human | 400  | 219  | 15 | 98   | 219-400-15-98    |
|        | SAMEA112765606 | LNS1288690 | 2020 | Human | 257  | 72   | 10 | 1    | 72-257-10-1      |
|        | SAMEA112765548 | LNS1304848 | 2019 | Human | 6175 | 543  | 9  | 1625 | 543-6175-9-1625  |
|        | SAMEA112765549 | LNS1380494 | 2019 | Human | 21   | 50   | 1  | 7    | 50-21-1-7        |



|        |                |            |      |       |       |      |    |      |                  |
|--------|----------------|------------|------|-------|-------|------|----|------|------------------|
|        | SAMEA112765600 | LNS1410767 | 2020 | Human | 2254  | 51   | 9  | 1    | 51-2254-9-1      |
|        | SAMEA112765610 | LNS1467429 | 2020 | Human | 10045 | 2063 | 3  | 60   | 2063-10045-3-60  |
|        | SAMEA112765671 | LNS1470215 | 2021 | Human | 10846 | 2379 | 8  | 2    | 2379-10846-8-2   |
|        | SAMEA112765459 | LNS1515213 | 2018 | Human | 6175  | 543  | 9  | 1625 | 543-6175-9-1625  |
|        | SAMEA112765460 | LNS1574307 | 2018 | Human | 6175  | 543  | 9  | 1625 | 543-6175-9-1625  |
|        | SAMEA112765461 | LNS1578743 | 2018 | Human | 353   | 166  | 9  | 164  | 166-353-9-164    |
|        | SAMEA112765462 | LNS1662782 | 2018 | Human | 50    | 53   | 1  | 6    | 53-50-1-6        |
|        | SAMEA112765591 | LNS1668617 | 2020 | Human | 7355  | 2151 | 9  | 2360 | 2151-7355-9-2360 |
|        | SAMEA112765463 | LNS1668621 | 2018 | Human | 6175  | 543  | 9  | 1625 | 543-6175-9-1625  |
|        | SAMEA112765464 | LNS1675319 | 2018 | Human | 6175  | 543  | 9  | 1625 | 543-6175-9-1625  |
|        | SAMEA112765550 | LNS1725997 | 2019 | Human | 10045 | 2063 | 3  | 60   | 2063-10045-3-60  |
|        | SAMEA112765465 | LNS1754341 | 2018 | Human | 19    | 1355 | 8  | 1    | 1355-19-8-1      |
|        | SAMEA112765632 | LNS1806192 | 2020 | Human | 122   | 377  | 3  | 7    | 377-122-3-7      |
|        | SAMEA112765676 | LNS1821686 | 2021 | Human | 50    | 53   | 1  | 6    | 53-50-1-6        |
| 114943 | SAMEA112763490 | LNS1834063 | 2021 | Human | 19    | 82   | 8  | 7    | 82-19-8-7        |
| 110015 | SAMEA112763484 | LNS1866633 | 2019 | Human | 19    | 82   | 8  | 7    | 82-19-8-7        |
|        | SAMEA112765551 | LNS1881298 | 2019 | Human | 50    | 53   | 1  | 6    | 53-50-1-6        |
|        | SAMEA112765628 | LNS1958743 | 2020 | Human | 122   | 377  | 3  | 7    | 377-122-3-7      |
| 114933 | SAMEA112763479 | LNS1987825 | 2018 | Human | 475   | 827  | 5  | 67   | 827-475-5-67     |
| 114938 | SAMEA112763485 | LNS2069990 | 2019 | Human | 475   | 827  | 5  | 67   | 827-475-5-67     |
| 114930 | SAMEA112763476 | LNS2124172 | 2018 | Human | 19    | 82   | 8  | 7    | 82-19-8-7        |
|        | SAMEA112765466 | LNS2136373 | 2018 | Human | 50    | 441  | 3  | 6    | 441-50-3-6       |
|        | SAMEA112765592 | LNS2163380 | 2020 | Human | 10045 | 2063 | 3  | 60   | 2063-10045-3-60  |
|        | SAMEA112765668 | LNS2167432 | 2021 | Human | 10846 | 2379 | 8  | 2    | 2379-10846-8-2   |
|        | SAMEA112765467 | LNS2266426 | 2018 | Human | 353   | 166  | 9  | 164  | 166-353-9-164    |
|        | SAMEA112765468 | LNS2299557 | 2018 | Human | 6175  | 543  | 9  | 1625 | 543-6175-9-1625  |
|        | SAMEA112765469 | LNS2335828 | 2018 | Human | 353   | 166  | 9  | 164  | 166-353-9-164    |
|        | SAMEA112765607 | LNS2407788 | 2020 | Human | 2254  | 51   | 9  | 1    | 51-2254-9-1      |
|        | SAMEA112765552 | LNS2436514 | 2019 | Human | 6175  | 543  | 9  | 1625 | 543-6175-9-1625  |
|        | SAMEA112765633 | LNS2460455 | 2020 | Human | 257   | 72   | 10 | 1    | 72-257-10-1      |
|        | SAMEA112765553 | LNS2468064 | 2019 | Human | 6175  | 543  | 9  | 1625 | 543-6175-9-1625  |
|        | SAMEA112765639 | LNS2469830 | 2020 | Human | 10846 | 2379 | 8  | 2    | 2379-10846-8-2   |

|        |                |            |      |       |       |      |    |      |                  |
|--------|----------------|------------|------|-------|-------|------|----|------|------------------|
| 114934 | SAMEA112763480 | LNS2470460 | 2018 | Human | 475   | 827  | 5  | 67   | 827-475-5-67     |
|        | SAMEA112765658 | LNS2506582 | 2021 | Human | 257   | 72   | 10 | 1    | 72-257-10-1      |
|        | SAMEA112765554 | LNS2641285 | 2019 | Human | 10045 | 2063 | 3  | 60   | 2063-10045-3-60  |
| 114931 | SAMEA112763477 | LNS2671467 | 2018 | Human | 19    | 82   | 8  | 7    | 82-19-8-7        |
|        | SAMEA112765619 | LNS2680632 | 2020 | Human | 50    | 1377 | 3  | 6    | 1377-50-3-6      |
| 114932 | SAMEA112763478 | LNS2772674 | 2018 | Human | 19    | 82   | 8  | 7    | 82-19-8-7        |
| 114935 | SAMEA112763481 | LNS2986469 | 2019 | Human | 19    | 82   | 8  | 7    | 82-19-8-7        |
|        | SAMEA112765616 | LNS3025831 | 2020 | Human | 7355  | 2151 | 9  | 2360 | 2151-7355-9-2360 |
|        | SAMEA112765470 | LNS3090015 | 2018 | Human | 50    | 441  | 3  | 6    | 441-50-3-6       |
|        | SAMEA112765471 | LNS3149868 | 2018 | Human | 6175  | 543  | 9  | 1625 | 543-6175-9-1625  |
|        | SAMEA112765611 | LNS3172954 | 2020 | Human | 7355  | 2151 | 9  | 2360 | 2151-7355-9-2360 |
|        | SAMEA112765472 | LNS3220880 | 2018 | Human | 6175  | 543  | 9  | 1625 | 543-6175-9-1625  |
|        | SAMEA112765653 | LNS3245052 | 2021 | Human | 10846 | 2379 | 8  | 2    | 2379-10846-8-2   |
| 114927 | SAMEA112763473 | LNS3267197 | 2018 | Human | 1044  | 84   | 27 | 25   | 84-1044-27-25    |
| 114925 | SAMEA112763471 | LNS3278856 | 2018 | Human | 475   | 827  | 5  | 67   | 827-475-5-67     |
|        | SAMEA112765685 | LNS3301082 | 2021 | Human | 6175  | 543  | 9  | 1625 | 543-6175-9-1625  |
|        | SAMEA112765598 | LNS3326294 | 2020 | Human | 6175  | 543  | 9  | 1625 | 543-6175-9-1625  |
|        | SAMEA112765683 | LNS3429263 | 2021 | Human | 122   | 377  | 3  | 7    | 377-122-3-7      |
|        | SAMEA112765630 | LNS3461998 | 2020 | Human | 122   | 377  | 3  | 7    | 377-122-3-7      |
|        | SAMEA112765473 | LNS3498860 | 2018 | Human | 353   | 166  | 9  | 164  | 166-353-9-164    |
|        | SAMEA112765474 | LNS3553881 | 2018 | Human | 353   | 166  | 9  | 164  | 166-353-9-164    |
|        | SAMEA112765555 | LNS3603719 | 2019 | Human | 6175  | 543  | 9  | 1625 | 543-6175-9-1625  |
|        | SAMEA112765475 | LNS3663438 | 2018 | Human | 400   | 219  | 15 | 98   | 219-400-15-98    |
|        | SAMEA112765476 | LNS3669946 | 2018 | Human | 400   | 219  | 15 | 98   | 219-400-15-98    |
|        | SAMEA112765637 | LNS3673907 | 2020 | Human | 7355  | 2151 | 9  | 2360 | 2151-7355-9-2360 |
|        | SAMEA112765556 | LNS3780275 | 2019 | Human | 50    | 1377 | 3  | 6    | 1377-50-3-6      |
|        | SAMEA112765477 | LNS3782382 | 2018 | Human | 6175  | 543  | 9  | 1625 | 543-6175-9-1625  |
|        | SAMEA112765478 | LNS3811300 | 2018 | Human | 400   | 219  | 15 | 98   | 219-400-15-98    |
|        | SAMEA112765667 | LNS3814770 | 2021 | Human | 21    | 50   | 1  | 7    | 50-21-1-7        |
|        | SAMEA112765617 | LNS3826485 | 2020 | Human | 7355  | 2151 | 9  | 2360 | 2151-7355-9-2360 |
|        | SAMEA112765557 | LNS3839297 | 2019 | Human | 400   | 219  | 15 | 98   | 219-400-15-98    |
|        | SAMEA112765479 | LNS3849481 | 2018 | Human | 353   | 166  | 9  | 164  | 166-353-9-164    |

|                |            |      |       |       |      |    |      |                  |
|----------------|------------|------|-------|-------|------|----|------|------------------|
| SAMEA112765480 | LNS3851048 | 2018 | Human | 400   | 219  | 15 | 98   | 219-400-15-98    |
| SAMEA112765481 | LNS3878735 | 2018 | Human | 50    | 441  | 3  | 6    | 441-50-3-6       |
| SAMEA112765601 | LNS3909174 | 2020 | Human | 10045 | 2063 | 3  | 60   | 2063-10045-3-60  |
| SAMEA112765558 | LNS3923052 | 2019 | Human | 257   | 72   | 10 | 1    | 72-257-10-1      |
| SAMEA112765673 | LNS3971881 | 2021 | Human | 10846 | 2379 | 8  | 2    | 2379-10846-8-2   |
| SAMEA112765482 | LNS3996841 | 2018 | Human | 353   | 166  | 9  | 164  | 166-353-9-164    |
| SAMEA112765483 | LNS4032871 | 2018 | Human | 257   | 72   | 10 | 1    | 72-257-10-1      |
| SAMEA112765484 | LNS4078899 | 2018 | Human | 353   | 166  | 9  | 164  | 166-353-9-164    |
| SAMEA112765485 | LNS4086976 | 2018 | Human | 400   | 219  | 15 | 98   | 219-400-15-98    |
| SAMEA112765642 | LNS4127269 | 2020 | Human | 122   | 377  | 3  | 7    | 377-122-3-7      |
| SAMEA112765638 | LNS4257815 | 2020 | Human | 7355  | 2151 | 9  | 2360 | 2151-7355-9-2360 |
| SAMEA112765675 | LNS4326122 | 2021 | Human | 122   | 377  | 3  | 7    | 377-122-3-7      |
| SAMEA112765559 | LNS4335150 | 2019 | Human | 6175  | 543  | 9  | 1625 | 543-6175-9-1625  |
| SAMEA112765635 | LNS4348168 | 2020 | Human | 7355  | 2151 | 9  | 2360 | 2151-7355-9-2360 |
| SAMEA112765602 | LNS4385826 | 2020 | Human | 6175  | 543  | 9  | 1625 | 543-6175-9-1625  |
| SAMEA112765560 | LNS4495349 | 2019 | Human | 10045 | 2063 | 3  | 60   | 2063-10045-3-60  |
| SAMEA112765486 | LNS4511334 | 2018 | Human | 21    | 50   | 1  | 7    | 50-21-1-7        |
| SAMEA112765487 | LNS4571000 | 2018 | Human | 50    | 53   | 1  | 6    | 53-50-1-6        |
| SAMEA112765599 | LNS4633233 | 2020 | Human | 50    | 1377 | 3  | 6    | 1377-50-3-6      |
| SAMEA112765629 | LNS4654607 | 2020 | Human | 400   | 219  | 15 | 98   | 219-400-15-98    |
| SAMEA112765643 | LNS4663040 | 2020 | Human | 19    | 1355 | 8  | 1    | 1355-19-8-1      |
| SAMEA112765684 | LNS4674810 | 2021 | Human | 257   | 72   | 10 | 1    | 72-257-10-1      |
| SAMEA112765488 | LNS4704353 | 2018 | Human | 50    | 441  | 3  | 6    | 441-50-3-6       |
| SAMEA112765489 | LNS4760909 | 2018 | Human | 122   | 377  | 3  | 7    | 377-122-3-7      |
| SAMEA112765669 | LNS4766033 | 2021 | Human | 10846 | 2379 | 8  | 2    | 2379-10846-8-2   |
| SAMEA112765609 | LNS4778500 | 2020 | Human | 19    | 1355 | 8  | 1    | 1355-19-8-1      |
| SAMEA112765490 | LNS4786690 | 2018 | Human | 6175  | 543  | 9  | 1625 | 543-6175-9-1625  |
| SAMEA112765561 | LNS4808088 | 2019 | Human | 50    | 441  | 3  | 6    | 441-50-3-6       |
| SAMEA112765674 | LNS4817241 | 2021 | Human | 2254  | 51   | 9  | 1    | 51-2254-9-1      |
| SAMEA112765491 | LNS4885850 | 2018 | Human | 19    | 1355 | 8  | 1    | 1355-19-8-1      |
| SAMEA112765636 | LNS4891524 | 2020 | Human | 10846 | 2379 | 8  | 2    | 2379-10846-8-2   |
| SAMEA112765492 | LNS4917969 | 2018 | Human | 6175  | 543  | 9  | 1625 | 543-6175-9-1625  |

|        |                |            |      |        |       |      |    |      |                  |
|--------|----------------|------------|------|--------|-------|------|----|------|------------------|
|        | SAMEA112765493 | LNS4926602 | 2018 | Human  | 6175  | 543  | 9  | 1625 | 543-6175-9-1625  |
|        | SAMEA112765562 | LNS4926940 | 2019 | Human  | 50    | 441  | 3  | 6    | 441-50-3-6       |
|        | SAMEA112765670 | LNS4939672 | 2021 | Human  | 21    | 50   | 1  | 7    | 50-21-1-7        |
|        | SAMEA112765603 | LNS5004765 | 2020 | Human  | 7355  | 2151 | 9  | 2360 | 2151-7355-9-2360 |
|        | SAMEA112765563 | LNS5062104 | 2019 | Human  | 6175  | 543  | 9  | 1625 | 543-6175-9-1625  |
|        | SAMEA112765597 | LNS5149213 | 2020 | Human  | 2254  | 51   | 9  | 1    | 51-2254-9-1      |
| 114944 | SAMEA112763491 | LNS5178364 | 2021 | Human  | 1044  | 84   | 27 | 25   | 84-1044-27-25    |
|        | SAMEA112765494 | LNS5184657 | 2018 | Human  | 50    | 441  | 3  | 6    | 441-50-3-6       |
|        | SAMEA112765614 | LNS5239796 | 2020 | Human  | 19    | 1355 | 8  | 1    | 1355-19-8-1      |
| 114937 | SAMEA112763483 | LNS5328171 | 2019 | Human  | 19    | 82   | 8  | 7    | 82-19-8-7        |
| 114940 | SAMEA112763487 | LNS5390735 | 2020 | Human  | 1044  | 84   | 27 | 25   | 84-1044-27-25    |
| 114941 | SAMEA112763488 | LNS5392364 | 2021 | Human  | 19    | 82   | 8  | 7    | 82-19-8-7        |
|        | SAMEA112765564 | LNS5409610 | 2019 | Human  | 257   | 72   | 10 | 1    | 72-257-10-1      |
|        | SAMEA112765495 | LNS5480964 | 2018 | Human  | 6175  | 543  | 9  | 1625 | 543-6175-9-1625  |
|        | SAMEA112765496 | LNS5554270 | 2018 | Human  | 353   | 166  | 9  | 164  | 166-353-9-164    |
|        | SAMEA112765497 | LNS5556180 | 2018 | Human  | 6175  | 543  | 9  | 1625 | 543-6175-9-1625  |
|        | SAMEA112765498 | LNS5565670 | 2018 | Human  | 353   | 166  | 9  | 164  | 166-353-9-164    |
|        | SAMEA112765499 | LNS5625996 | 2018 | Human  | 2254  | 51   | 9  | 1    | 51-2254-9-1      |
|        | SAMEA112765662 | LNS5684448 | 2021 | Human  | 10846 | 2379 | 8  | 2    | 2379-10846-8-2   |
|        | SAMEA112765500 | LNS5700864 | 2018 | Human  | 6175  | 543  | 9  | 1625 | 543-6175-9-1625  |
|        | SAMEA112765661 | LNS5730504 | 2021 | Human  | 21    | 50   | 1  | 7    | 50-21-1-7        |
|        | SAMEA112765644 | LNS5733036 | 2020 | Human  | 10846 | 2379 | 8  | 2    | 2379-10846-8-2   |
| 114929 | SAMEA112763475 | LNS5803147 | 2018 | Human  | 475   | 827  | 3  | 67   | 827-475-3-67     |
|        | SAMEA112765605 | LNS5965469 | 2020 | Human  | 6175  | 543  | 9  | 1625 | 543-6175-9-1625  |
|        | SAMEA112765501 | LNS5967632 | 2018 | Human  | 122   | 377  | 3  | 7    | 377-122-3-7      |
|        | SAMEA112765678 | LNS5971235 | 2021 | Human  | 353   | 166  | 9  | 131  | 166-353-9-131    |
|        | SAMEA112765660 | LNS5998684 | 2021 | Human  | 2254  | 51   | 9  | 1    | 51-2254-9-1      |
|        | SAMEA112765565 | LNS6042390 | 2019 | Human  | 6175  | 543  | 9  | 1625 | 543-6175-9-1625  |
|        | SAMEA112765502 | LNS6067339 | 2018 | Humain | 353   | 166  | 9  | 164  | 166-353-9-164    |
|        | SAMEA112765626 | LNS6102005 | 2020 | Human  | 6175  | 543  | 9  | 1625 | 543-6175-9-1625  |
|        | SAMEA112765503 | LNS6102664 | 2018 | Human  | 50    | 441  | 3  | 6    | 441-50-3-6       |
|        | SAMEA112765504 | LNS6259234 | 2018 | Human  | 50    | 441  | 3  | 6    | 441-50-3-6       |

|        |                |            |      |        |       |      |    |      |                  |
|--------|----------------|------------|------|--------|-------|------|----|------|------------------|
|        | SAMEA112765613 | LNS6315603 | 2020 | Human  | 19    | 1355 | 8  | 1    | 1355-19-8-1      |
|        | SAMEA112765663 | LNS6357384 | 2021 | Human  | 10045 | 2063 | 3  | 60   | 2063-10045-3-60  |
|        | SAMEA112765505 | LNS6409576 | 2018 | Human  | 6175  | 543  | 9  | 1625 | 543-6175-9-1625  |
|        | SAMEA112765566 | LNS6432252 | 2019 | Human  | 50    | 53   | 1  | 6    | 53-50-1-6        |
|        | SAMEA112765506 | LNS6447723 | 2018 | Human  | 2254  | 51   | 9  | 1    | 51-2254-9-1      |
|        | SAMEA112765507 | LNS6547049 | 2018 | Human  | 6175  | 543  | 9  | 1625 | 543-6175-9-1625  |
|        | SAMEA112765508 | LNS6557340 | 2018 | Humain | 353   | 166  | 9  | 164  | 166-353-9-164    |
|        | SAMEA112765596 | LNS6574677 | 2020 | Human  | 6175  | 543  | 9  | 1625 | 543-6175-9-1625  |
|        | SAMEA112765623 | LNS6590045 | 2020 | Human  | 7355  | 2151 | 9  | 2360 | 2151-7355-9-2360 |
|        | SAMEA112765567 | LNS6665366 | 2019 | Human  | 50    | 53   | 1  | 6    | 53-50-1-6        |
|        | SAMEA112765509 | LNS6735307 | 2018 | Human  | 6175  | 543  | 9  | 1625 | 543-6175-9-1625  |
|        | SAMEA112765680 | LNS6784486 | 2021 | Human  | 50    | 441  | 3  | 6    | 441-50-3-6       |
|        | SAMEA112765510 | LNS6843297 | 2018 | Human  | 6175  | 543  | 9  | 1625 | 543-6175-9-1625  |
|        | SAMEA112765568 | LNS6945529 | 2019 | Human  | 122   | 377  | 3  | 7    | 377-122-3-7      |
|        | SAMEA112765622 | LNS6997530 | 2020 | Human  | 50    | 1377 | 3  | 6    | 1377-50-3-6      |
|        | SAMEA112765511 | LNS6999135 | 2018 | Human  | 353   | 166  | 9  | 164  | 166-353-9-164    |
|        | SAMEA112765512 | LNS7035520 | 2018 | Human  | 2254  | 51   | 9  | 1    | 51-2254-9-1      |
|        | SAMEA112765594 | LNS7051397 | 2020 | Human  | 10045 | 2063 | 3  | 60   | 2063-10045-3-60  |
|        | SAMEA112765569 | LNS7177981 | 2019 | Human  | 50    | 1377 | 3  | 6    | 1377-50-3-6      |
|        | SAMEA112765620 | LNS7206545 | 2020 | Human  | 50    | 1377 | 3  | 6    | 1377-50-3-6      |
|        | SAMEA112765513 | LNS7210357 | 2018 | Human  | 400   | 219  | 15 | 98   | 219-400-15-98    |
|        | SAMEA112765646 | LNS7265199 | 2020 | Human  | 10846 | 2379 | 8  | 2    | 2379-10846-8-2   |
|        | SAMEA112765514 | LNS7265268 | 2018 | Human  | 50    | 441  | 3  | 6    | 441-50-3-6       |
|        | SAMEA112765570 | LNS7298634 | 2019 | Human  | 6175  | 543  | 9  | 1625 | 543-6175-9-1625  |
|        | SAMEA112765515 | LNS7304798 | 2018 | Human  | 400   | 219  | 15 | 98   | 219-400-15-98    |
| 114936 | SAMEA112763482 | LNS7314261 | 2019 | Human  | 19    | 82   | 8  | 7    | 82-19-8-7        |
|        | SAMEA112765571 | LNS7389331 | 2019 | Human  | 122   | 377  | 3  | 7    | 377-122-3-7      |
|        | SAMEA112765516 | LNS7463476 | 2018 | Human  | 6175  | 543  | 9  | 1625 | 543-6175-9-1625  |
|        | SAMEA112765572 | LNS7647010 | 2019 | Human  | 6175  | 543  | 9  | 1625 | 543-6175-9-1625  |
|        | SAMEA112765517 | LNS7653924 | 2018 | Human  | 400   | 219  | 15 | 98   | 219-400-15-98    |
|        | SAMEA112765518 | LNS7665344 | 2018 | Human  | 400   | 219  | 15 | 98   | 219-400-15-98    |
|        | SAMEA112765519 | LNS7684455 | 2018 | Human  | 50    | 441  | 3  | 6    | 441-50-3-6       |

|        |                |            |      |       |       |      |    |      |                 |
|--------|----------------|------------|------|-------|-------|------|----|------|-----------------|
|        | SAMEA112765520 | LNS7685200 | 2018 | Human | 50    | 441  | 3  | 6    | 441-50-3-6      |
|        | SAMEA112765573 | LNS7718383 | 2019 | Human | 21    | 50   | 1  | 7    | 50-21-1-7       |
| 114942 | SAMEA112763489 | LNS7784891 | 2021 | Human | 19    | 82   | 8  | 7    | 82-19-8-7       |
|        | SAMEA112765589 | LNS7841065 | 2020 | Human | 122   | 377  | 3  | 7    | 377-122-3-7     |
|        | SAMEA112765574 | LNS7858885 | 2019 | Human | 122   | 377  | 3  | 7    | 377-122-3-7     |
|        | SAMEA112765666 | LNS7859802 | 2021 | Human | 10846 | 2379 | 8  | 2    | 2379-10846-8-2  |
|        | SAMEA112765521 | LNS7866515 | 2018 | Human | 6175  | 543  | 9  | 1625 | 543-6175-9-1625 |
|        | SAMEA112765522 | LNS8050392 | 2018 | Human | 353   | 166  | 9  | 164  | 166-353-9-164   |
|        | SAMEA112765593 | LNS8055349 | 2020 | Human | 10045 | 2063 | 3  | 60   | 2063-10045-3-60 |
|        | SAMEA112765523 | LNS8091791 | 2018 | Human | 353   | 166  | 9  | 164  | 166-353-9-164   |
|        | SAMEA112765575 | LNS8113426 | 2019 | Human | 50    | 1377 | 3  | 6    | 1377-50-3-6     |
|        | SAMEA112765524 | LNS8138066 | 2018 | Human | 6175  | 543  | 9  | 1625 | 543-6175-9-1625 |
|        | SAMEA112765525 | LNS8138670 | 2018 | Human | 6175  | 543  | 9  | 1625 | 543-6175-9-1625 |
|        | SAMEA112765576 | LNS8170996 | 2019 | Human | 257   | 72   | 10 | 1    | 72-257-10-1     |
|        | SAMEA112765526 | LNS8188016 | 2018 | Human | 353   | 166  | 9  | 164  | 166-353-9-164   |
|        | SAMEA112765527 | LNS8401581 | 2018 | Human | 353   | 166  | 9  | 164  | 166-353-9-164   |
|        | SAMEA112765682 | LNS8452384 | 2021 | Human | 6175  | 543  | 9  | 1625 | 543-6175-9-1625 |
|        | SAMEA112765634 | LNS8508707 | 2020 | Human | 10846 | 2379 | 8  | 2    | 2379-10846-8-2  |
|        | SAMEA112765577 | LNS8527914 | 2019 | Human | 10045 | 2063 | 3  | 60   | 2063-10045-3-60 |
|        | SAMEA112765657 | LNS8562189 | 2021 | Human | 10846 | 2379 | 8  | 2    | 2379-10846-8-2  |
|        | SAMEA112765578 | LNS8564581 | 2019 | Human | 400   | 219  | 15 | 98   | 219-400-15-98   |
|        | SAMEA112765588 | LNS8688859 | 2020 | Human | 122   | 377  | 3  | 7    | 377-122-3-7     |
| 114939 | SAMEA112763486 | LNS8719332 | 2020 | Human | 1044  | 84   | 27 | 25   | 84-1044-27-25   |
|        | SAMEA112765681 | LNS8729088 | 2021 | Human | 6175  | 543  | 9  | 1625 | 543-6175-9-1625 |
|        | SAMEA112765621 | LNS8865000 | 2020 | Human | 50    | 1377 | 3  | 6    | 1377-50-3-6     |
|        | SAMEA112765677 | LNS8907005 | 2021 | Human | 19    | 1355 | 8  | 1    | 1355-19-8-1     |
|        | SAMEA112765528 | LNS9158783 | 2018 | Human | 50    | 1377 | 3  | 6    | 1377-50-3-6     |
|        | SAMEA112765529 | LNS9184192 | 2018 | Human | 21    | 50   | 1  | 7    | 50-21-1-7       |
|        | SAMEA112765627 | LNS9241924 | 2020 | Human | 10846 | 2379 | 8  | 2    | 2379-10846-8-2  |
|        | SAMEA112765530 | LNS9262320 | 2018 | Human | 50    | 441  | 3  | 6    | 441-50-3-6      |
|        | SAMEA112765531 | LNS9287348 | 2018 | Human | 400   | 219  | 15 | 98   | 219-400-15-98   |
|        | SAMEA112765579 | LNS9388969 | 2019 | Human | 21    | 50   | 1  | 7    | 50-21-1-7       |

|        |                |            |      |       |       |      |    |      |                  |
|--------|----------------|------------|------|-------|-------|------|----|------|------------------|
|        | SAMEA112765532 | LNS9444847 | 2018 | Human | 353   | 166  | 9  | 164  | 166-353-9-164    |
|        | SAMEA112765608 | LNS9473484 | 2020 | Human | 7355  | 2151 | 9  | 2360 | 2151-7355-9-2360 |
|        | SAMEA112765533 | LNS9478489 | 2018 | Human | 50    | 441  | 3  | 6    | 441-50-3-6       |
|        | SAMEA112765534 | LNS9515553 | 2018 | Human | 353   | 166  | 9  | 164  | 166-353-9-164    |
|        | SAMEA112765535 | LNS9539548 | 2018 | Human | 6175  | 543  | 9  | 1625 | 543-6175-9-1625  |
|        | SAMEA112765536 | LNS9665428 | 2018 | Human | 353   | 166  | 9  | 164  | 166-353-9-164    |
|        | SAMEA112765651 | LNS9725252 | 2021 | Human | 10846 | 2379 | 8  | 2    | 2379-10846-8-2   |
| 114926 | SAMEA112763472 | LNS9806031 | 2018 | Human | 1044  | 84   | 27 | 25   | 84-1044-27-25    |
|        | SAMEA112765615 | LNS9833853 | 2020 | Human | 257   | 72   | 10 | 1    | 72-257-10-1      |
|        | SAMEA112765537 | LNS9959957 | 2018 | Human | 50    | 53   | 1  | 6    | 53-50-1-6        |

**Supplementary Table 3** - Number of human recurring genotypes isolated between 2018 and 2021 and number of these isolates found in food and animal samples. The largest number of human recurring genotypes based per one-year periods is highlighted in bold. The letter corresponds to the origin of food and animal isolates: b, bovine; c, chicken; f, food with species not defined; p, poultry; t, turkey.

| Recurring genotypes | Number of human isolates |           |           |          |           | Food and animal isolates |            |            |            |
|---------------------|--------------------------|-----------|-----------|----------|-----------|--------------------------|------------|------------|------------|
|                     | 2018                     | 2019      | 2020      | 2021     | Total     | 2018                     | 2019       | 2020       | 2021       |
| 543-6175-9-1625     | <b>32</b>                | <b>11</b> | 6         | 3        | <b>52</b> | 2(c), 1(p)               |            |            | 1(c)       |
| 166-353-9-164       | 22                       | 1         |           | 1        | 24        | 1(b)                     | 1(c), 1(f) |            |            |
| 441-50-3-6          | 14                       | 2         | 2         | 2        | 20        |                          |            |            |            |
| 219-400-15-98       | 13                       | 3         | 1         |          | 17        |                          | 1(p)       |            |            |
| 377-122-3-7         | 2                        | 3         | 8         | 3        | 16        |                          |            | 1(c)       |            |
| 2379-10846-8-2      |                          |           | 6         | <b>9</b> | 15        |                          |            |            |            |
| 2151-7355-9-2360    |                          |           | <b>13</b> | 1        | 14        |                          |            | 1(b), 1(p) | 1(b)       |
| 51-2254-9-1         | 6                        |           | 4         | 3        | 13        |                          |            |            |            |
| 1377-50-3-6         | 2                        | 3         | 6         |          | 11        |                          |            | 1(c)       |            |
| 50-21-1-7           | 3                        | 4         |           | 4        | 11        |                          |            | 1(c)       |            |
| 82-19-8-7           | 4                        | 4         |           | 3        | 11        | 5(b)                     | 2(b)       | 4(b), 1(t) | 3(b)       |
| 1355-19-8-1         | 2                        |           | 6         | 2        | 10        |                          |            | 1(c)       | 1(b), 1(t) |
| 2063-10045-3-60     |                          | 4         | 5         | 1        | 10        |                          |            |            |            |
| 72-257-10-1         | 1                        | 4         | 3         | 2        | 10        | 1(c)                     |            | 2(c)       | 1(b)       |
| 53A-50-1-6          | 4                        | 4         |           | 1        | 9         | 1(c)                     |            | 1(c)       |            |
| 17-21-1-48          | 5                        | 3         | 1         |          | 9         | 2(b)                     |            | 2(b)       | 1(b)       |
| 277-22-1-70         | 5                        | 1         | 1         | 2        | 9         | 1(b), 1(f)               |            |            |            |
| 1837-2079-3-67      | 5                        | 3         |           |          | 8         |                          |            |            |            |
| 46B-21-8-7          | 4                        | 1         | 1         | 2        | 8         | 5(b)                     | 3(b)       | 2(b)       | 2(b)       |
| 75-464-8-1678       | 7                        | 1         |           |          | 8         |                          |            |            |            |
| 147-44-8-11         | 4                        | 1         | 1         | 1        | 7         |                          | 1(c)       |            |            |
| 1600-50-8-6         | 2                        | 1         |           | 4        | 7         |                          |            |            |            |
| 2149-10298-8-2364   |                          |           | 6         | 1        | 7         |                          |            | 1(c)       |            |
| 662-8334-9-98       | 3                        | 2         | 1         | 1        | 7         |                          |            |            |            |
| 85-5018-1-51        | 6                        | 1         |           |          | 7         |                          |            |            |            |
| 68B-354-8-957       | 2                        | 2         | 2         |          | 6         |                          |            | 1(t)       |            |
| 87-48-3-14          | 4                        |           | 1         | 1        | 6         | 1(c)                     |            |            |            |
| 1385-8579-8-957     | 5                        |           |           |          | 5         |                          |            |            |            |
| 1451-7517-10-10     | 4                        | 1         |           |          | 5         |                          | 1(p)       |            |            |
| 153-48-5-7          | 3                        |           |           | 2        | 5         |                          |            | 1(c)       |            |



|                   |   |   |   |   |            |            |
|-------------------|---|---|---|---|------------|------------|
| 1615-50-8-6       | 3 | 1 | 1 | 5 |            |            |
| 1660-354-8-58     | 2 | 3 |   | 5 |            |            |
| 1909-48-5-6       |   | 5 |   | 5 |            |            |
| 2226-122-3-7      |   |   | 3 | 2 |            | 1(b)       |
| 2974-11328-5-14   |   |   |   | 5 |            |            |
| 313-2274-9-705    | 4 |   | 1 | 5 |            |            |
| 46A-21-8-2068     | 5 |   |   | 5 |            |            |
| 827-475-5-67      | 4 | 1 |   | 5 | 1(b)       | 1(c), 1(t) |
| 84-1044-27-25     | 2 |   | 2 | 1 |            |            |
| 914-441-9-115     | 3 |   |   | 2 |            |            |
| 1333-19-1-327     | 3 |   | 1 | 4 |            | 1(c)       |
| 1461-21-8-37      | 4 |   |   | 4 |            | 1(b)       |
| 1601-48-5-7       | 4 |   |   | 4 |            |            |
| 1868-10025-3-92   | 1 | 3 |   | 4 | 1(c), 2(p) | 3(c)       |
| 2230-904-17-6     |   |   | 3 | 1 |            | 2(c)       |
| 295-52-10-1       | 4 |   |   | 4 |            |            |
| 54-257-10-360     |   | 1 |   | 3 |            |            |
| 595A-3155-8-2059  | 4 |   |   | 4 |            |            |
| 732A-53-1-27      |   | 4 |   | 4 |            |            |
| 732B-53-1-331     |   |   | 4 | 4 |            | 1(c)       |
| 1555-52-9-1       | 3 |   |   | 3 |            |            |
| 2047-257-10-1     |   | 3 |   | 3 |            |            |
| 2054-658-27-25    |   | 3 |   | 3 |            |            |
| 2145-52-9-1       |   |   | 3 | 3 |            |            |
| 288-21-1-7        |   | 3 |   | 3 |            |            |
| 527-3155-8-2059   | 3 |   |   | 3 |            |            |
| 53B-50-1-80       |   | 3 |   | 3 |            |            |
| 595B-3155-93-2059 | 3 |   |   | 3 |            |            |
| 68A-354-8-2207    | 3 |   |   | 3 |            |            |

---

*Supplementary Table 4 – Concordance between genotyping CT(SeqSphere)-ST-gyrA-porA and the BIGsdb genotyping and the number of isolates corresponding.*

| Genotypes              | Correspondence BIGsdb (AD)* | Collection Luxembourg in BIGsdb |            |      |          |         | Environment | Collection BIGsdb |
|------------------------|-----------------------------|---------------------------------|------------|------|----------|---------|-------------|-------------------|
|                        |                             | Human                           | Wild Birds | Food | Ruminant | Poultry |             |                   |
| <b>CT-ST-gyrA-porA</b> |                             |                                 |            |      |          |         |             |                   |
| 82-19-8-7              | Cjc_cgc_10 group_59 (10)    | 27                              | 1          | 1    | 24       | 3       | 2           | 356               |
| 84-1044-27-25          | Cjc_cgc_10 group_1159 (10)  | 2                               | 1          |      |          |         | 1           | 4                 |
| 827-475-5-67           | Cjc_cgc_25 group_164 (25)   | 4                               | 1          | 1    | 1        | 1       |             | 42                |

\*AD = Allele Distance defined as cutoff
